# Supplementary material for: 3D lanthanide-coordination frameworks constructed by a ternary mixed-ligand: crystal structure, luminescence and luminescence sensing
Source: Royal Society of Chemistry journal article supplement (doi:10.1039/c9ce01779h), 2019-12-13
Supplement: c9ce01779h1.pdf [file c9ce01779h1.pdf]

Electronic Supplementary Information

**3D lanthanide-coordination frameworks constructed by a ternary mixed-ligand:  
crystal structure, luminescence and luminescence sensing**

Qi-Wei Xu, Gaoyun Dong, Ruifang Cui and Xia Li\*

Department of Chemistry, Capital Normal University, Beijing, 100048, China.

**Table of Contents**

1. The PXRD patterns of Ln-MOF. (Fig. S1)
2. N<sub>2</sub> sorption isotherm at 77 K under 1 bar of Eu-MOF. (Fig. S2)
3. TG curve of Eu-MOF. (Fig. S3)
4. PXRD patterns of Eu-MOF in different organic solvents and in aqueous solution with different pH for 3 days. (Fig. S4)
5. The solid state emission spectra of Gd-MOF and the ligands. (Fig. S5)
6. CIE image of Ln-MOFs. (Fig. S6)
7. Emission patterns of Eu-MOF in different excitation wavelengths. (Fig. S7)
8. CIE image (1, H<sub>2</sub>O; 2, ethyl acetate; 3, THF; 4, acetone; 5, CH<sub>3</sub>CN; 6, CH<sub>3</sub>OH; 7, EtOH; 8, CH<sub>2</sub>Cl<sub>2</sub>; 9, isopropanol; 10, DMF). (Fig. S8)
9. The chemical structures of quercetin, catechin, daidzein, catechol, resorcin and hydroquinone. (Fig. S9)
10. PXRD patterns of Eu-MOF after luminescence sensing for quercetin and Fe<sup>3+</sup>. (Fig. S10)
11. UV–Vis absorption spectra of other analogues with excitation spectrum of Eu-MOF (372 nm, the maximum absorption of quercetin). (Fig. S11)
12. The luminescence intensity of Eu-MOF in different cations with and without the Fe<sup>3+</sup>. (Fig. S12)
13. The UV–Vis absorption spectra of metal ions and Eu-MOF. (Fig. S13)
14. (a) Emission spectra of Eu-MOF dispersed in ethanol solution containing different metal ions, (b) Emission intensity of Eu-MOF at 616 nm (<sup>5</sup>D<sub>0</sub>→<sup>7</sup>F<sub>2</sub>), (c) Emission spectra of Eu-MOF with the addition of the Fe<sup>3+</sup>, (d) the Stern–Volmer plot for the quenching of Eu-MOF in ethanol solution. (Fig. S14)

15. (a) Emission spectra of Eu-MOF dispersed in acetone solution containing different metal ions, (b) Emission intensity of Eu-MOF at 616 nm ( $^5D_0 \rightarrow ^7F_2$ ), (c) Emission spectra of Eu-MOF with the addition of the  $Fe^{3+}$ , (d) the Stern–Volmer plot for the quenching of Eu-MOF in acetone solution. (Fig. S15)
16. (a) Emission spectra of Eu-MOF dispersed in acetonitrile solution containing different metal ions, (b) Emission intensity of Eu-MOF at 616 nm ( $^5D_0 \rightarrow ^7F_2$ ), (c) Emission spectra of Eu-MOF with the addition of the  $Fe^{3+}$ , (d) the Stern–Volmer plot for the quenching of Eu-MOF in acetonitrile solution. (Fig. S16)
17. (a) Emission spectra of Eu-MOF dispersed in ethyl acetate solution containing different metal ions, (b) Emission intensity of Eu-MOF at 616 nm ( $^5D_0 \rightarrow ^7F_2$ ), (c) Emission spectra of Eu-MOF with the addition of the  $Fe^{3+}$ , (d) the Stern–Volmer plot for the quenching of Eu-MOF in ethyl acetate solution. (Fig. S17)
18. Selected bond lengths [ $\text{\AA}$ ] and angles [ $^\circ$ ] for complexes **1-5**. (Table S1)
19. A Comparison of the Detection Limits of  $Fe^{3+}$  with Other Reported. (Table S2)

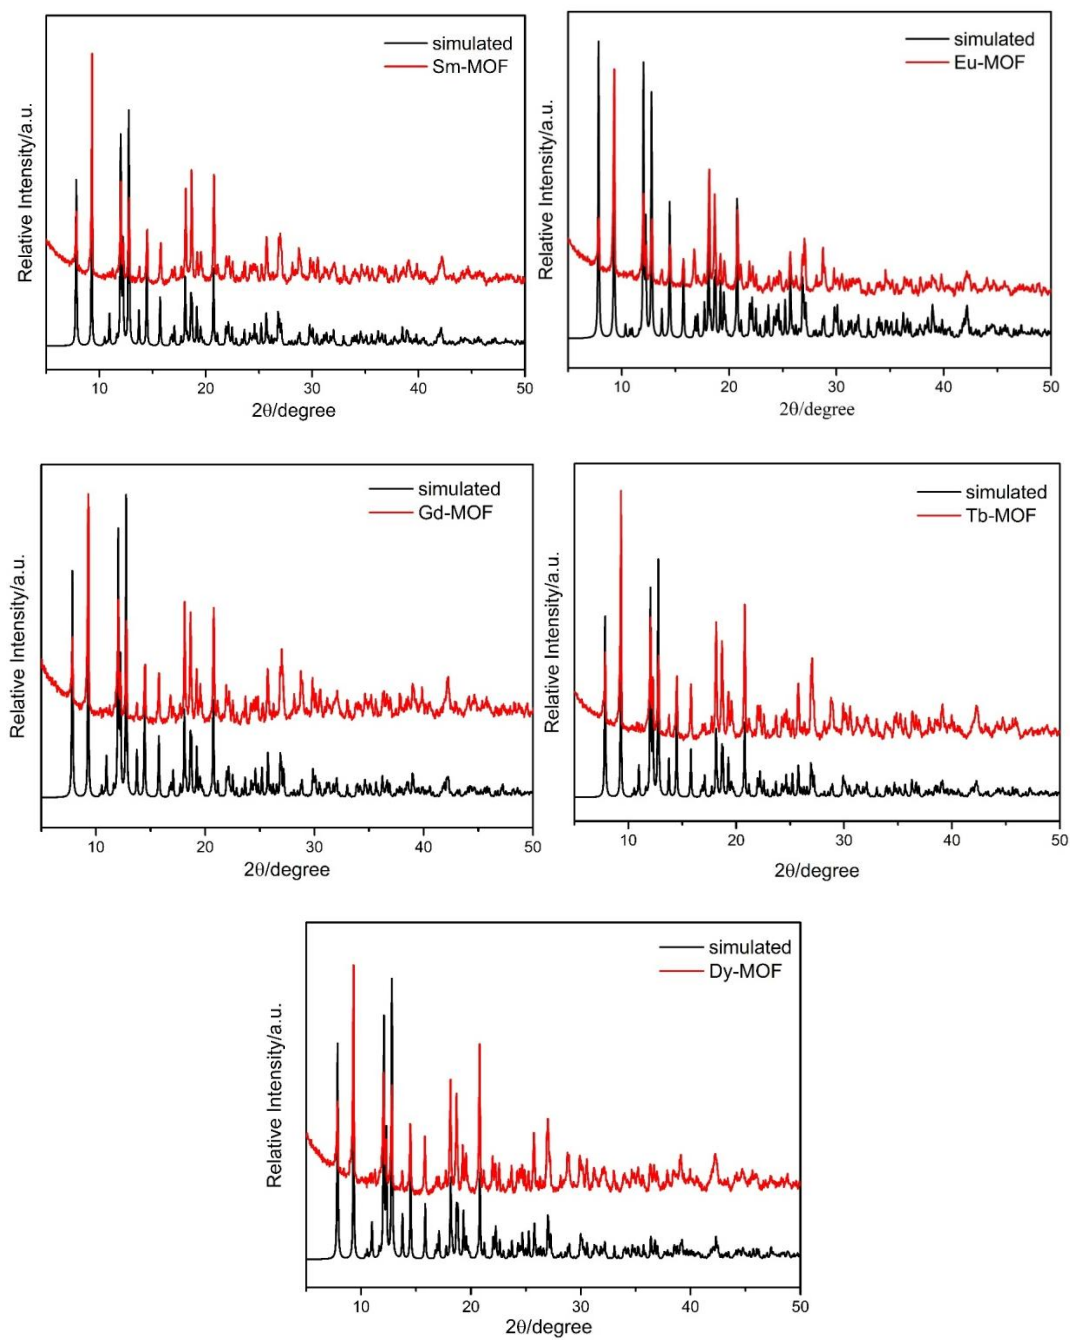

Fig. S1 The PXR D patterns of Ln-MOFs.

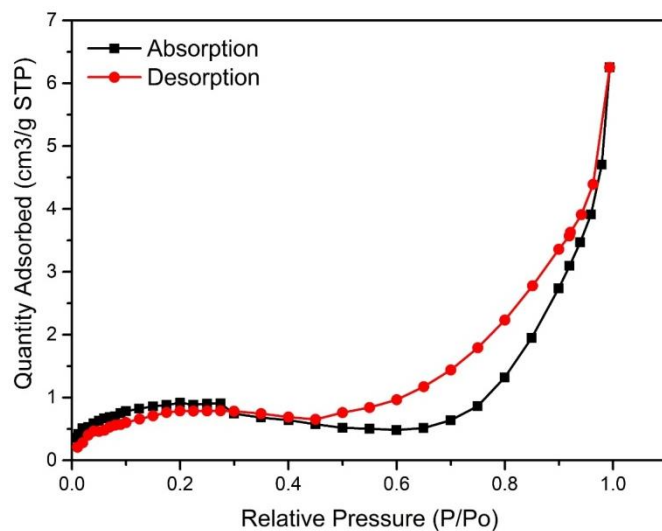

Fig. S2 N<sub>2</sub> sorption isotherm at 77 K under 1 bar of Eu-MOF.

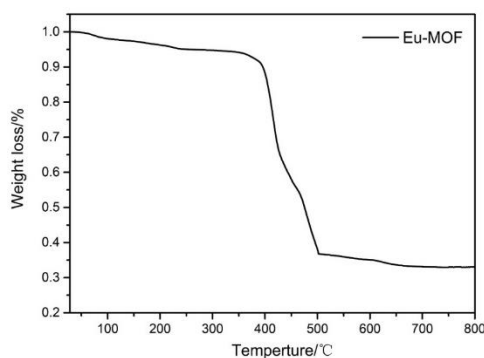

Fig. S3 TG curve of Eu-MOF.

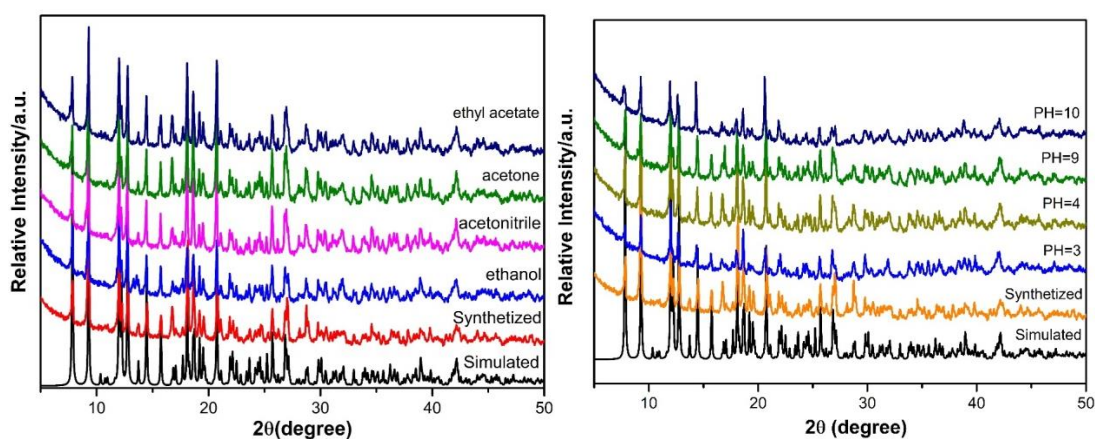

Fig. S4 PXRD patterns of Eu-MOF in different organic solvents and in aqueous solution with different pH for 3 days. (The Eu-MOF samples were dispersed in different organic solvents or in aqueous solution (pH = 3, 4, 9, 10), and then were sonicated (10 min). After 3 days, the ground solid samples were collected, washed with deionized water and desiccated for PXRD testing.)

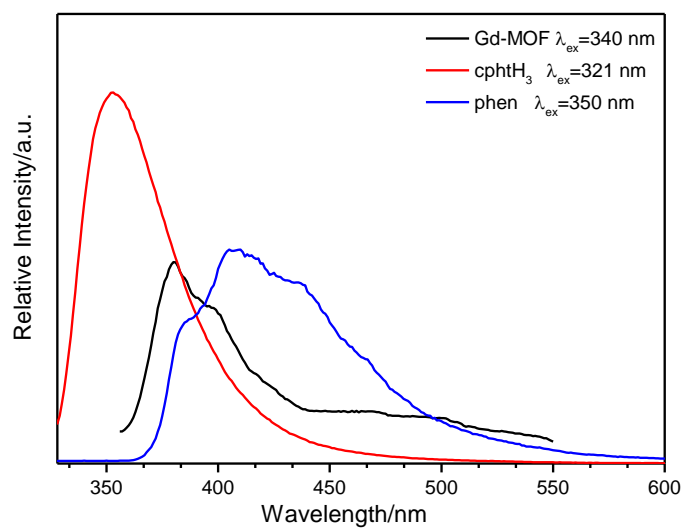

Fig. S5 The solid state emission spectra of Gd-MOF and the ligands.

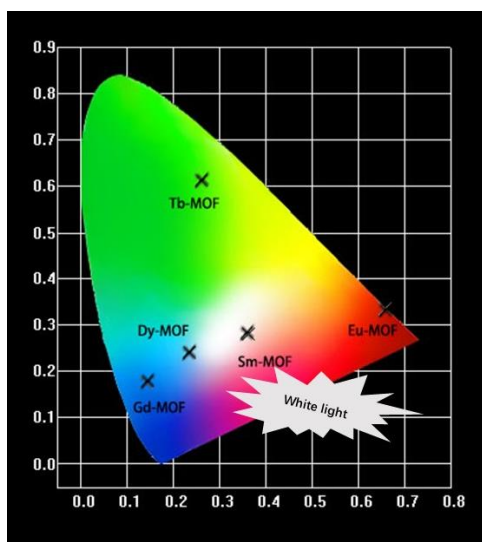

Fig. S6 CIE image of Ln-MOFs.

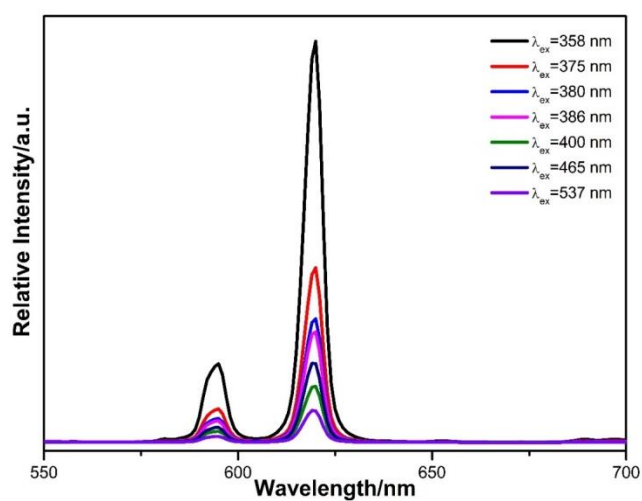

Fig. S7 Emission patterns of Eu-MOF in different excitation wavelengths.

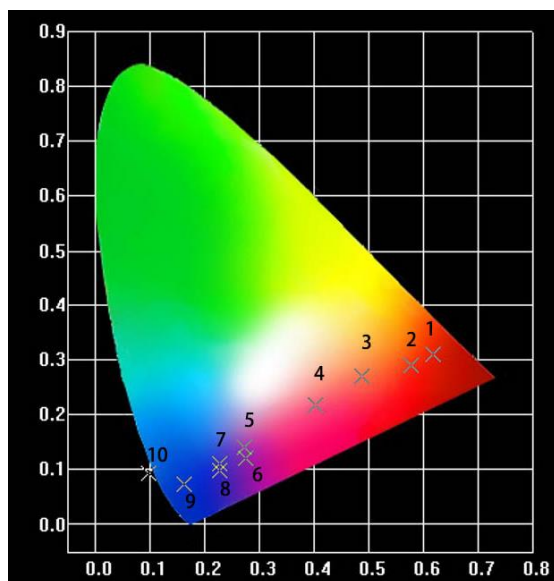

Fig. S8 CIE image(1, H<sub>2</sub>O; 2, ethyl acetate; 3, THF; 4, acetone; 5, CH<sub>3</sub>CN; 6, CH<sub>3</sub>OH; 7, EtOH; 8, CH<sub>2</sub>Cl<sub>2</sub>; 9, isopropanol; 10, DMF).

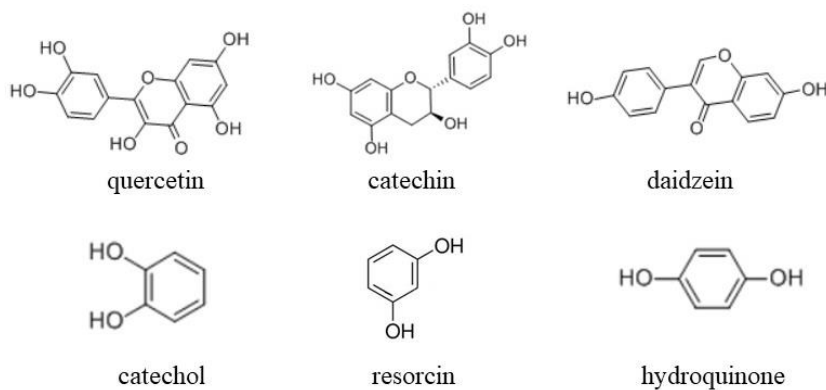

Fig. S9 The chemical structures of quercetin, catechin, daidzein, catechol, resorcin and hydroquinone.

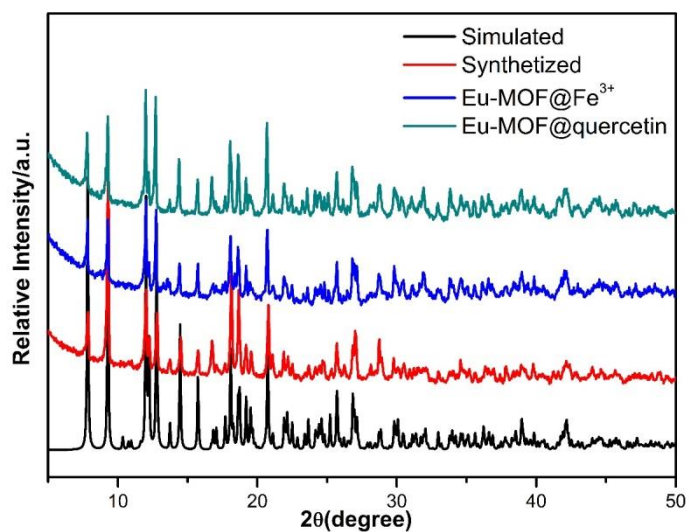

Fig. S10 PXRD patterns of Eu-MOF after luminescence sensing for quercetin and Fe<sup>3+</sup>.

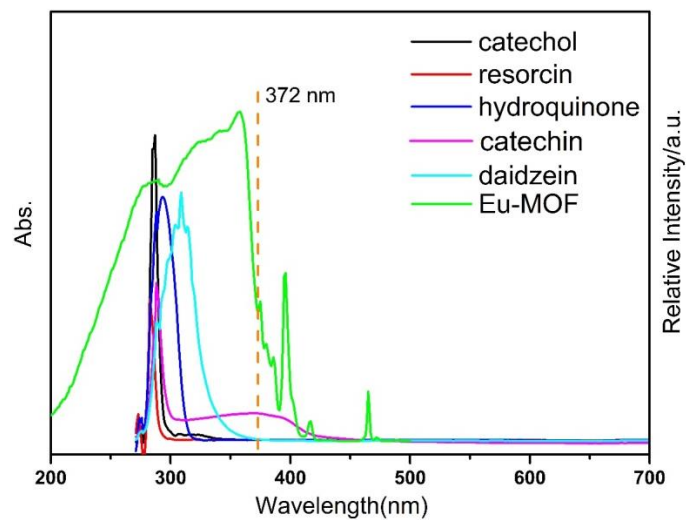

Fig. S11 UV-Vis absorption spectra of other analogues with excitation spectrum of Eu-MOF (372 nm, the maximum absorption of quercetin).

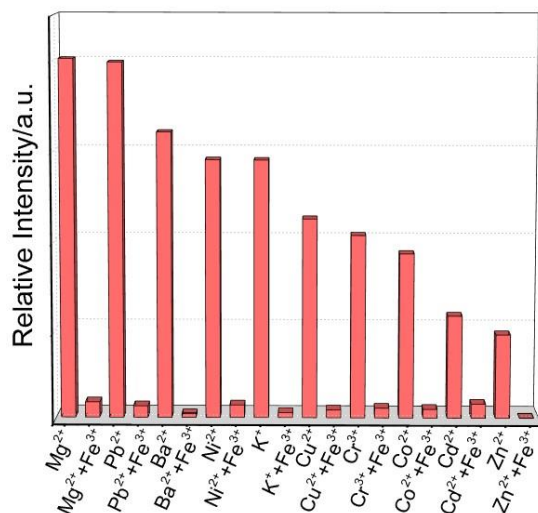

Fig. S12 The luminescence intensity of Eu-MOF in different cations with and without the  $\text{Fe}^{3+}$ .

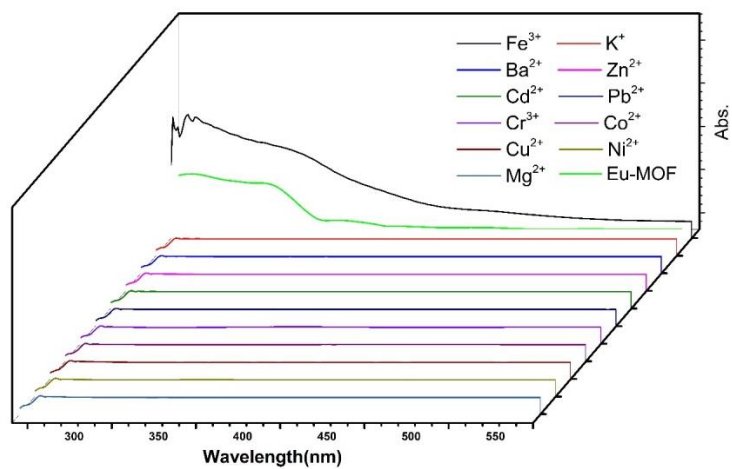

Fig. S13 The UV-Vis absorption spectra of metal ions and Eu-MOF.

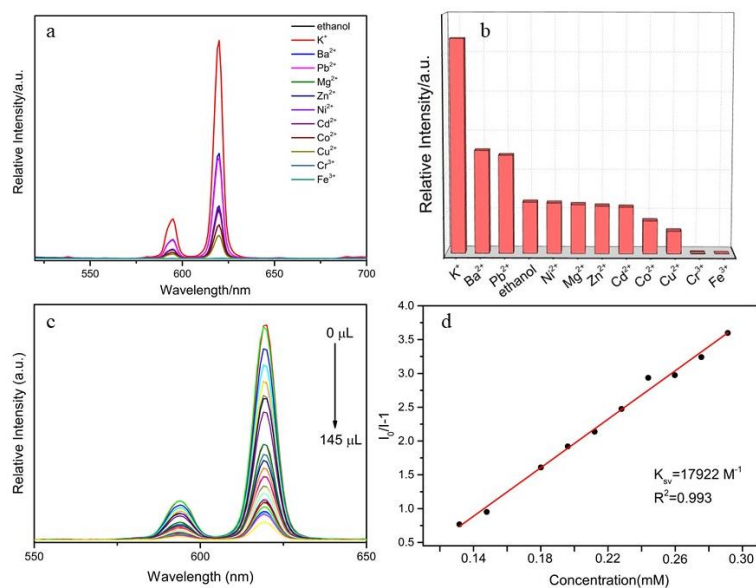

Fig. S14 (a) Emission spectra of Eu-MOF dispersed in ethanol solution containing different metal ions, (b) Emission intensity of Eu-MOF at 616 nm (<sup>5</sup>D<sub>0</sub>→<sup>7</sup>F<sub>2</sub>), (c) Emission spectra of Eu-MOF with the addition of the Fe<sup>3+</sup>, (d) the Stern–Volmer plot for the quenching of Eu-MOF in ethanol solution.

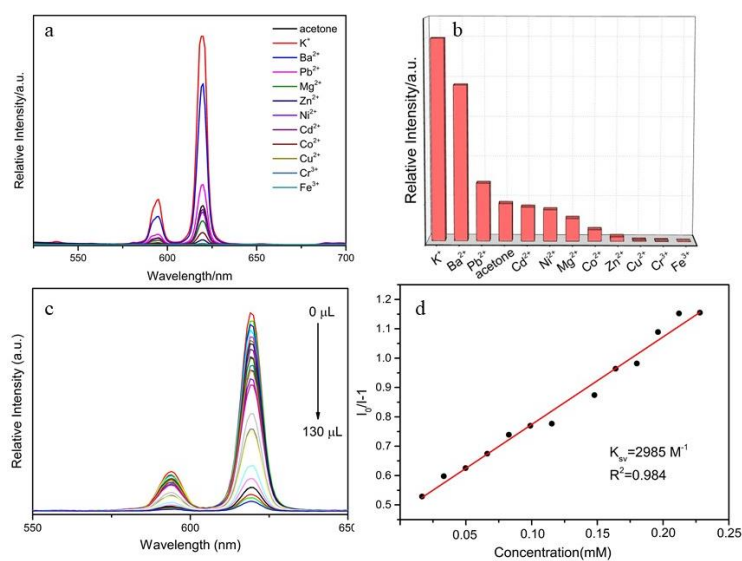

Fig. S15 (a) Emission spectra of Eu-MOF dispersed in acetone solution containing different metal ions, (b) Emission intensity of Eu-MOF at 616 nm (<sup>5</sup>D<sub>0</sub>→<sup>7</sup>F<sub>2</sub>), (c) Emission spectra of Eu-MOF with the addition of the Fe<sup>3+</sup>, (d) the Stern–Volmer plot for the quenching of Eu-MOF in acetone solution.



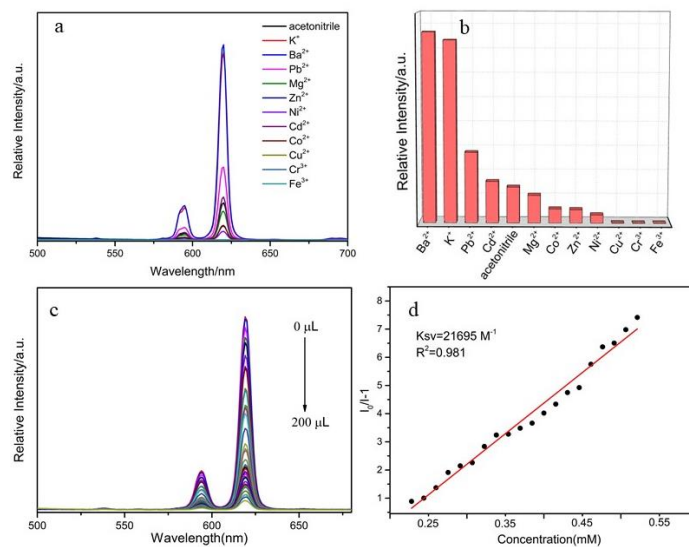

Fig. S16 (a) Emission spectra of Eu-MOF dispersed in acetonitrile solution containing different metal ions, (b) Emission intensity of Eu-MOF at 616 nm ( $^5D_0 \rightarrow ^7F_2$ ), (c) Emission spectra of Eu-MOF with the addition of the  $Fe^{3+}$ , (d) the Stern–Volmer plot for the quenching of Eu-MOF in acetonitrile solution.

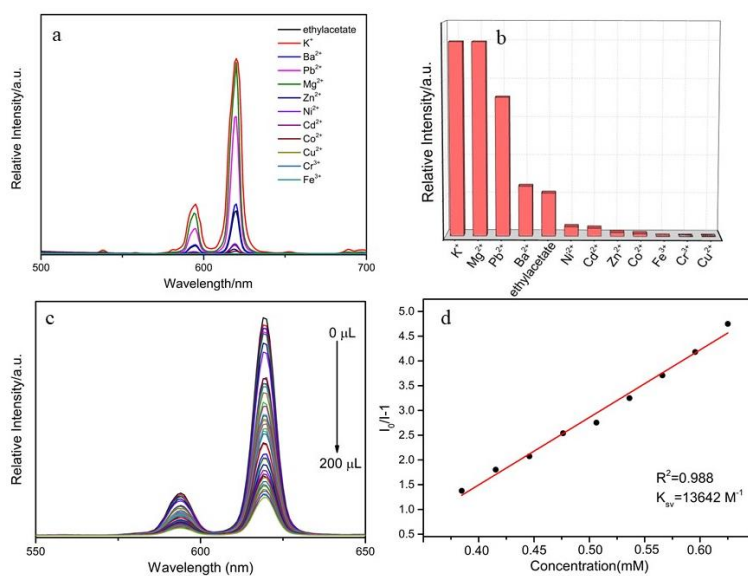

Fig. S17 (a) Emission spectra of Eu-MOF dispersed in ethyl acetate solution containing different metal ions, (b) Emission intensity of Eu-MOF at 616 nm ( $^5D_0 \rightarrow ^7F_2$ ), (c) Emission spectra of Eu-MOF with the addition of the  $Fe^{3+}$ , (d) the Stern–Volmer plot for the quenching of Eu-MOF in ethyl acetate solution.

Table S1 Selected bond lengths [ $\text{\AA}$ ] and angles [ $^\circ$ ] for complexes **1-5**.

| <b>1</b>          |            |                   |            |
|-------------------|------------|-------------------|------------|
| Sm(1)-O(5)A       | 2.388(3)   | Sm(1)-O(8)        | 2.406(4)   |
| Sm(1)-O(3)        | 2.437(3)   | Sm(1)-O(4)B       | 2.472(3)   |
| Sm(1)-O(7)C       | 2.481(3)   | Sm(1)-O(6)C       | 2.488(3)   |
| Sm(1)-O(1)B       | 2.497(3)   | Sm(1)-N(2)        | 2.599(4)   |
| Sm(1)-N(1)        | 2.623(4)   |                   |            |
| O(5)A-Sm(1)-O(8)  | 81.34(11)  | O(5)A-Sm(1)-O(3)  | 67.85(10)  |
| O(8)-Sm(1)-O(3)   | 133.11(11) | O(5)A-Sm(1)-O(4)B | 131.62(11) |
| O(8)-Sm(1)-O(4)B  | 76.19(11)  | O(3)-Sm(1)-O(4)B  | 98.32(11)  |
| O(5)A-Sm(1)-O(7)C | 75.43(11)  | O(8)-Sm(1)-O(7)C  | 71.44(11)  |
| O(3)-Sm(1)-O(7)C  | 128.46(11) | O(4)B-Sm(1)-O(7)C | 133.22(11) |
| O(5)A-Sm(1)-O(6)C | 128.55(11) | O(8)-Sm(1)-O(6)C  | 79.92(11)  |
| O(3)-Sm(1)-O(6)C  | 146.97(11) | O(4)B-Sm(1)-O(6)C | 88.86(11)  |
| O(7)C-Sm(1)-O(6)C | 53.21(11)  | O(5)A-Sm(1)-O(1)B | 79.91(11)  |
| O(8)-Sm(1)-O(1)B  | 72.39(11)  | O(3)-Sm(1)-O(1)B  | 68.18(10)  |
| O(4)B-Sm(1)-O(1)B | 52.65(11)  | O(7)C-Sm(1)-O(1)B | 138.62(11) |
| O(6)C-Sm(1)-O(1)B | 136.51(11) | O(5)A-Sm(1)-N(2)  | 83.52(12)  |
| O(8)-Sm(1)-N(2)   | 140.56(12) | O(3)-Sm(1)-N(2)   | 71.47(11)  |
| O(4)B-Sm(1)-N(2)  | 137.85(13) | O(7)C-Sm(1)-N(2)  | 69.56(12)  |
| O(6)C-Sm(1)-N(2)  | 81.59(11)  | O(1)B-Sm(1)-N(2)  | 139.61(11) |
| O(5)A-Sm(1)-N(1)  | 134.60(12) | O(8)-Sm(1)-N(1)   | 143.85(13) |
| O(3)-Sm(1)-N(1)   | 72.72(11)  | O(4)B-Sm(1)-N(1)  | 74.92(12)  |
| O(7)C-Sm(1)-N(1)  | 115.43(12) | O(6)C-Sm(1)-N(1)  | 78.24(12)  |
| O(1)B-Sm(1)-N(1)  | 105.59(12) | N(2)-Sm(1)-N(1)   | 62.96(14)  |
| <b>2</b>          |            |                   |            |
| Eu(1)-O(8)        | 2.371(3)   | Eu(1)-O(1)A       | 2.398(3)   |
| Eu(1)-O(9)        | 2.443(3)   | Eu(1)-O(4)B       | 2.458(3)   |
| Eu(1)-O(6)        | 2.468(3)   | Eu(1)-O(7)        | 2.483(3)   |
| Eu(1)-O(5)B       | 2.497(3)   | Eu(1)-N(2)        | 2.590(4)   |
| Eu(1)-N(1)        | 2.619(4)   |                   |            |
| O(8)-Eu(1)-O(1)A  | 81.28(12)  | O(8)-Eu(1)-O(9)   | 67.88(9)   |
| O(1)A-Eu(1)-O(9)  | 133.40(11) | O(8)-Eu(1)-O(4)B  | 131.53(10) |
| O(1)A-Eu(1)-O(4)B | 75.92(11)  | O(9)-Eu(1)-O(4)B  | 98.84(10)  |
| O(8)-Eu(1)-O(6)   | 75.75(10)  | O(1)A-Eu(1)-O(6)  | 71.46(12)  |
| O(9)-Eu(1)-O(6)   | 128.42(11) | O(4)B-Eu(1)-O(6)  | 132.74(11) |
| O(8)-Eu(1)-O(7)   | 128.57(10) | O(1)A-Eu(1)-O(7)  | 79.65(12)  |
| O(9)-Eu(1)-O(7)   | 146.94(11) | O(4)B-Eu(1)-O(7)  | 88.55(11)  |
| O(6)-Eu(1)-O(7)   | 52.93(11)  | O(8)-Eu(1)-O(5)B  | 79.90(10)  |
| O(1)A-Eu(1)-O(5)B | 72.43(12)  | O(9)-Eu(1)-O(5)B  | 68.52(10)  |
| O(4)B-Eu(1)-O(5)B | 52.66(10)  | O(6)-Eu(1)-O(5)B  | 138.84(11) |
| O(7)-Eu(1)-O(5)B  | 136.25(11) | O(8)-Eu(1)-N(2)   | 83.70(11)  |

|                  |            |                  |            |
|------------------|------------|------------------|------------|
| O(1)A-Eu(1)-N(2) | 140.47(12) | O(9)-Eu(1)-N(2)  | 71.28(11)  |
| O(4)B-Eu(1)-N(2) | 138.04(11) | O(6)-Eu(1)-N(2)  | 69.46(12)  |
| O(7)-Eu(1)-N(2)  | 81.69(12)  | O(5)B-Eu(1)-N(2) | 139.77(12) |
| O(8)-Eu(1)-N(1)  | 134.71(11) | O(1)A-Eu(1)-N(1) | 143.76(13) |
| O(9)-Eu(1)-N(1)  | 72.50(10)  | O(4)B-Eu(1)-N(1) | 74.93(11)  |
| O(6)-Eu(1)-N(1)  | 115.46(11) | O(7)-Eu(1)-N(1)  | 78.56(12)  |
| O(5)B-Eu(1)-N(1) | 105.30(12) | N(2)-Eu(1)-N(1)  | 63.15(12)  |

---

**3**

---

|                   |            |                   |            |
|-------------------|------------|-------------------|------------|
| Gd(1)-O(9)A       | 2.359(2)   | Gd(1)-O(1)        | 2.381(3)   |
| Gd(1)-O(8)        | 2.432(2)   | Gd(1)-O(4)B       | 2.445(2)   |
| Gd(1)-O(7)C       | 2.463(3)   | Gd(1)-O(6)C       | 2.476(3)   |
| Gd(1)-O(5)B       | 2.493(3)   | Gd(1)-N(18)       | 2.576(3)   |
| Gd(1)-N(1)        | 2.609(3)   |                   |            |
| O(9)A-Gd(1)-O(1)  | 80.78(10)  | O(9)A-Gd(1)-O(8)  | 68.11(8)   |
| O(1)-Gd(1)-O(8)   | 133.29(10) | O(9)A-Gd(1)-O(4)B | 131.58(9)  |
| O(1)-Gd(1)-O(4)B  | 75.79(10)  | O(8)-Gd(1)-O(4)B  | 99.31(9)   |
| O(9)A-Gd(1)-O(7)C | 75.69(9)   | O(1)-Gd(1)-O(7)C  | 71.35(10)  |
| O(8)-Gd(1)-O(7)C  | 128.45(9)  | O(4)B-Gd(1)-O(7)C | 132.24(9)  |
| O(9)A-Gd(1)-O(6)C | 128.76(9)  | O(1)-Gd(1)-O(6)C  | 79.83(11)  |
| O(8)-Gd(1)-O(6)C  | 146.89(10) | O(4)B-Gd(1)-O(6)C | 87.89(9)   |
| O(7)C-Gd(1)-O(6)C | 53.20(9)   | O(9)A-Gd(1)-O(5)B | 79.92(9)   |
| O(1)-Gd(1)-O(5)B  | 72.82(11)  | O(8)-Gd(1)-O(5)B  | 68.21(9)   |
| O(4)B-Gd(1)-O(5)B | 52.92(9)   | O(7)C-Gd(1)-O(5)B | 139.18(10) |
| O(6)C-Gd(1)-O(5)B | 136.24(10) | O(9)A-Gd(1)-N(18) | 83.86(10)  |
| O(1)-Gd(1)-N(18)  | 140.34(11) | O(8)-Gd(1)-N(18)  | 71.25(10)  |
| O(4)B-Gd(1)-N(18) | 138.23(10) | O(7)C-Gd(1)-N(18) | 69.48(10)  |
| O(6)C-Gd(1)-N(18) | 81.86(11)  | O(5)B-Gd(1)-N(18) | 139.43(10) |
| O(9)A-Gd(1)-N(1)  | 135.05(9)  | O(1)-Gd(1)-N(1)   | 143.90(11) |
| O(8)-Gd(1)-N(1)   | 72.49(9)   | O(4)B-Gd(1)-N(1)  | 74.95(10)  |
| O(7)C-Gd(1)-N(1)  | 115.60(10) | O(6)C-Gd(1)-N(1)  | 78.43(10)  |
| O(5)B-Gd(1)-N(1)  | 104.83(10) | N(18)-Gd(1)-N(1)  | 63.35(10)  |

---

**4**

---

|                   |            |                   |            |
|-------------------|------------|-------------------|------------|
| Tb(1)-O(8)A       | 2.349(4)   | Tb(1)-O(1)        | 2.375(4)   |
| Tb(1)-O(9)        | 2.423(4)   | Tb(1)-O(4)B       | 2.435(4)   |
| Tb(1)-O(7)C       | 2.449(4)   | Tb(1)-O(6)C       | 2.459(4)   |
| Tb(1)-O(5)B       | 2.471(4)   | Tb(1)-N(2)        | 2.559(5)   |
| Tb(1)-N(1)        | 2.593(5)   |                   |            |
| O(8)A-Tb(1)-O(1)  | 80.83(15)  | O(8)A-Tb(1)-O(9)  | 68.30(12)  |
| O(1)-Tb(1)-O(9)   | 133.08(14) | O(8)A-Tb(1)-O(4)B | 131.81(12) |
| O(1)-Tb(1)-O(4)B  | 75.59(14)  | O(9)-Tb(1)-O(4)B  | 99.22(13)  |
| O(8)A-Tb(1)-O(7)C | 75.29(13)  | O(1)-Tb(1)-O(7)C  | 71.40(14)  |
| O(9)-Tb(1)-O(7)C  | 128.58(14) | O(4)B-Tb(1)-O(7)C | 132.20(13) |

|                   |            |                   |            |
|-------------------|------------|-------------------|------------|
| O(8)A-Tb(1)-O(6)C | 129.08(13) | O(1)-Tb(1)-O(6)C  | 79.95(16)  |
| O(9)-Tb(1)-O(6)C  | 146.96(14) | O(4)B-Tb(1)-O(6)C | 87.28(14)  |
| O(7)C-Tb(1)-O(6)C | 53.92(13)  | O(8)A-Tb(1)-O(5)B | 79.99(13)  |
| O(1)-Tb(1)-O(5)B  | 72.72(15)  | O(9)-Tb(1)-O(5)B  | 67.90(13)  |
| O(4)B-Tb(1)-O(5)B | 53.12(13)  | O(7)C-Tb(1)-O(5)B | 138.97(14) |
| O(6)C-Tb(1)-O(5)B | 135.98(14) | O(8)A-Tb(1)-N(2)  | 83.58(14)  |
| O(1)-Tb(1)-N(2)   | 140.35(15) | O(9)-Tb(1)-N(2)   | 71.49(14)  |
| O(4)B-Tb(1)-N(2)  | 138.43(14) | O(7)C-Tb(1)-N(2)  | 69.44(15)  |
| O(6)C-Tb(1)-N(2)  | 82.16(15)  | O(5)B-Tb(1)-N(2)  | 139.35(15) |
| O(8)A-Tb(1)-N(1)  | 135.12(14) | O(1)-Tb(1)-N(1)   | 143.74(16) |
| O(9)-Tb(1)-N(1)   | 72.40(14)  | O(4)B-Tb(1)-N(1)  | 74.72(14)  |
| O(7)C-Tb(1)-N(1)  | 116.10(15) | O(6)C-Tb(1)-N(1)  | 78.31(15)  |
| O(5)B-Tb(1)-N(1)  | 104.56(15) | N(2)-Tb(1)-N(1)   | 63.79(15)  |

---

5

---

|                   |            |                   |            |
|-------------------|------------|-------------------|------------|
| Dy(1)-O(8)        | 2.335(3)   | Dy(1)-O(1)A       | 2.357(3)   |
| Dy(1)-O(9)B       | 2.412(3)   | Dy(1)-O(6)        | 2.419(3)   |
| Dy(1)-O(5)C       | 2.443(3)   | Dy(1)-O(4)C       | 2.436(3)   |
| Dy(1)-O(7)        | 2.466(3)   | Dy(1)-N(2)        | 2.550(4)   |
| Dy(1)-N(1)        | 2.588(4)   |                   |            |
|                   |            |                   |            |
| O(8)-Dy(1)-O(1)A  | 80.52(12)  | O(8)-Dy(1)-O(9)B  | 68.78(10)  |
| O(1)A-Dy(1)-O(9)B | 133.37(12) | O(8)-Dy(1)-O(6)   | 131.83(10) |
| O(1)A-Dy(1)-O(6)  | 75.63(12)  | O(9)B-Dy(1)-O(6)  | 99.30(10)  |
| O(8)-Dy(1)-O(5)C  | 129.07(11) | O(1)A-Dy(1)-O(5)C | 79.96(13)  |
| O(9)B-Dy(1)-O(5)C | 146.65(11) | O(6)-Dy(1)-O(5)C  | 87.02(11)  |
| O(8)-Dy(1)-O(4)C  | 75.54(10)  | O(1)A-Dy(1)-O(4)C | 71.24(12)  |
| O(9)B-Dy(1)-O(4)C | 128.96(11) | O(6)-Dy(1)-O(4)C  | 131.74(11) |
| O(5)C-Dy(1)-O(4)C | 53.68(11)  | O(8)-Dy(1)-O(7)   | 79.73(10)  |
| O(1)A-Dy(1)-O(7)  | 72.62(12)  | O(9)B-Dy(1)-O(7)  | 68.12(11)  |
| O(6)-Dy(1)-O(7)   | 53.45(10)  | O(5)C-Dy(1)-O(7)  | 135.98(12) |
| O(4)C-Dy(1)-O(7)  | 138.84(12) | O(8)-Dy(1)-N(2)   | 83.50(11)  |
| O(1)A-Dy(1)-N(2)  | 140.09(12) | O(9)B-Dy(1)-N(2)  | 71.31(11)  |
| O(6)-Dy(1)-N(2)   | 138.68(11) | O(5)C-Dy(1)-N(2)  | 82.33(12)  |
| O(4)C-Dy(1)-N(2)  | 69.43(12)  | O(7)-Dy(1)-N(2)   | 139.34(12) |
| O(8)-Dy(1)-N(1)   | 135.45(11) | O(1)A-Dy(1)-N(1)  | 143.75(13) |
| O(9)B-Dy(1)-N(1)  | 72.20(11)  | O(6)-Dy(1)-N(1)   | 74.72(11)  |
| O(5)C-Dy(1)-N(1)  | 78.13(12)  | O(4)C-Dy(1)-N(1)  | 115.85(12) |
| O(7)-Dy(1)-N(1)   | 104.89(12) | N(2)-Dy(1)-N(1)   | 64.04(12)  |

Symmetry transformations used to generate equivalent atoms:

For 1: A: 1-X,-Y,-Z; B: -X,-1/2+Y,-1/2-Z; C: -X,-Y,-1-Z

For 2: A: 1-X,-1-Y,-Z; B: +X,-1/2-Y,-1/2+Z; C: -X,-1-Y,-1-Z

For 3: A: -X,-1-Y,-Z; B: -1-X,1/2+Y,-1/2-Z; C: -1-X,-1-Y,-1-Z

For 4: A: 1-X,-Y,-Z; B: -X,-1/2+Y,-1/2-Z; C: -X,-Y,-1-Z

For 5: A: -1-X,-1/2+Y,-1/2-Z; B: -X,-1-Y,-Z; C: +X,-1/2-Y,-1/2+Z

Table S2 A Comparison of the Detection Limits of Fe<sup>3+</sup> with Other Reported

|        | <b>Method used</b> | <b>Solvent</b> | <b>LOD</b>          | <b>Reference</b> |
|--------|--------------------|----------------|---------------------|------------------|
| Eu-MOF | LD                 | acetone        | 0.473 mM            | This work        |
| Eu-MOF | LD                 | acetonitrile   | 0.065 mM            | This work        |
| Eu-MOF | LD                 | Ethyl acetate  | 0.103 mM            | This work        |
| Eu-MOF | LD                 | water          | 0.336 mM            | This work        |
| Eu-MOF | LD                 | water          | 0.023 mM            | S1               |
| Zn-MOF | LD                 | water          | 0.220 mM            | S2               |
| Co-MOF | LD                 | methanol       | 0.616 mM            | S4               |
| Co-MOF | LD                 | ethanol        | 0.264mM             | S4               |
| Eu-MOF | LD                 | ethanol        | 0.026 mM            | S3               |
| Eu-MOF | LD                 | ethanol        | 0.078 mM            | This work        |
| Tb-MOF | LD                 | DMF            | 10 <sup>-3</sup> mM | S5               |

LD = luminescent detection

## References

- S1. Y. L. Gai, Q. Guo, X. Y. Zhao, Y. Chen, S. Liu, Y. Zhang, C. X. Zhuo, C. Yao and K. C. Xiong, *Dalton Trans.*, 2018, **47**, 12051-12055.
- S2. W.-Q. Tong, W.-N. Liu, L.-L. Ma, Y. Wang, J.-M. Wang, L. Hou, Y.-Y. Wang, *Dalton Trans.*, 2019, **48**, 7786-7793.
- S3. G. P. Li, G. Liu, Y. Z. Li, L. Hou, Y. Y. Wang and Z. Zhu, *Inorg. Chem.*, 2016, **55**, 3952.
- S4. Y. Li, X. Wang, C. Xing, X. Zhang, Z. Liang, X. Wang, K. Zhang, Y. Wang, D. Liu, W. Fan and F. Dai, *Chinese Chemical Letters*, 2019, **30**, 1440-1444.
- S5. Q. Zhang, J. Wang, A. M. Kirillov, W. Dou, C. Xu, C. Xu, L. Yang, R. Fang and W. Liu, *ACS Appl. Mater. Interfaces*, 2018, **10**, 23976-23986.
